# Supplementary material for: The effects of enhanced primary healthcare interventions on primary care providers’ job satisfaction
Source: PubMed Central journal article supplement (PMC7158075; doi:10.1186/s12913-020-05183-9), 2020-04-15
Supplement: 12913_2020_5183_MOESM5_ESM.pdf [file 12913_2020_5183_MOESM5_ESM.pdf]

**NON- RESPONSE SURVEY FORM (HEALTHCARE PROVIDER)**

Name of the clinic: \_\_\_\_\_

1. Gender

- Male
- Female

2. What is your year of birth?

Year of birth: 19□□

3. Number of years in practice in primary care

Please fill in: \_\_\_\_\_ years

4. What are the reasons for your not participating in this study?

- Time constraints
- Concerned about my privacy and revealing information about myself
- Not interested as the outcome will not affect me
- I expect an incentive for participating
- I am afraid that the information collected will be used against me or to my disadvantage
- I have answered this survey before
- Others, please specify \_\_\_\_\_

5. To what extent do you agree with the following statements?

|   |                                                               | <b>Strongly Agree</b> | <b>Agree</b>          | <b>Disagree</b>       | <b>Strongly Disagree</b> |
|---|---------------------------------------------------------------|-----------------------|-----------------------|-----------------------|--------------------------|
| A | I feel that some parts of my work do not really make sense    | <input type="radio"/> | <input type="radio"/> | <input type="radio"/> | <input type="radio"/>    |
| B | My work still interests me as much as it ever did             | <input type="radio"/> | <input type="radio"/> | <input type="radio"/> | <input type="radio"/>    |
| C | My work is overloaded with unnecessary administrative detail  | <input type="radio"/> | <input type="radio"/> | <input type="radio"/> | <input type="radio"/>    |
| D | I have too much stress in my current job                      | <input type="radio"/> | <input type="radio"/> | <input type="radio"/> | <input type="radio"/>    |
| E | Being a healthcare provider is a well-respected job           | <input type="radio"/> | <input type="radio"/> | <input type="radio"/> | <input type="radio"/>    |
| F | In my work, there is a good balance between effort and reward | <input type="radio"/> | <input type="radio"/> | <input type="radio"/> | <input type="radio"/>    |

**THANK YOU FOR YOUR COOPERATION!**
